# Supplementary material for: Inpatient Costs of Treating Patients With COVID-19
Source: PubMed Central journal article supplement (PMC10765267; doi:10.1001/jamanetworkopen.2023.50145), 2024-01-03

## Supplementary Online Content

Kapinos KA, Peters RM Jr, Murphy RE, Hohmann SF, Podichetty A, Greenberg RS. Inpatient costs of treating patients with COVID-19. *JAMA Netw Open*. 2024;7(1):e2350145. doi:10.1001/jamanetworkopen.2023.50145

**eFigure 1.** Analytic Sample Construction Flow

**eTable 1.** GLM Regression Coefficients

**eTable 2.** Average Adjusted Costs, Length of Stay (LOS) by Presence of Elixhauser Comorbidity

**eTable 3.** Average Adjusted Mortality Rate, Age, and ECMO/Mechanical Ventilation Use, by Presence of Elixhauser Comorbidity

**eFigure 2.** Adjusted Costs of Inpatient by ECMO/Mechanical Ventilation and Week

This supplementary material has been provided by the authors to give readers additional information about their work.

**eFigure 1. Analytic Sample Construction Flow Diagram**

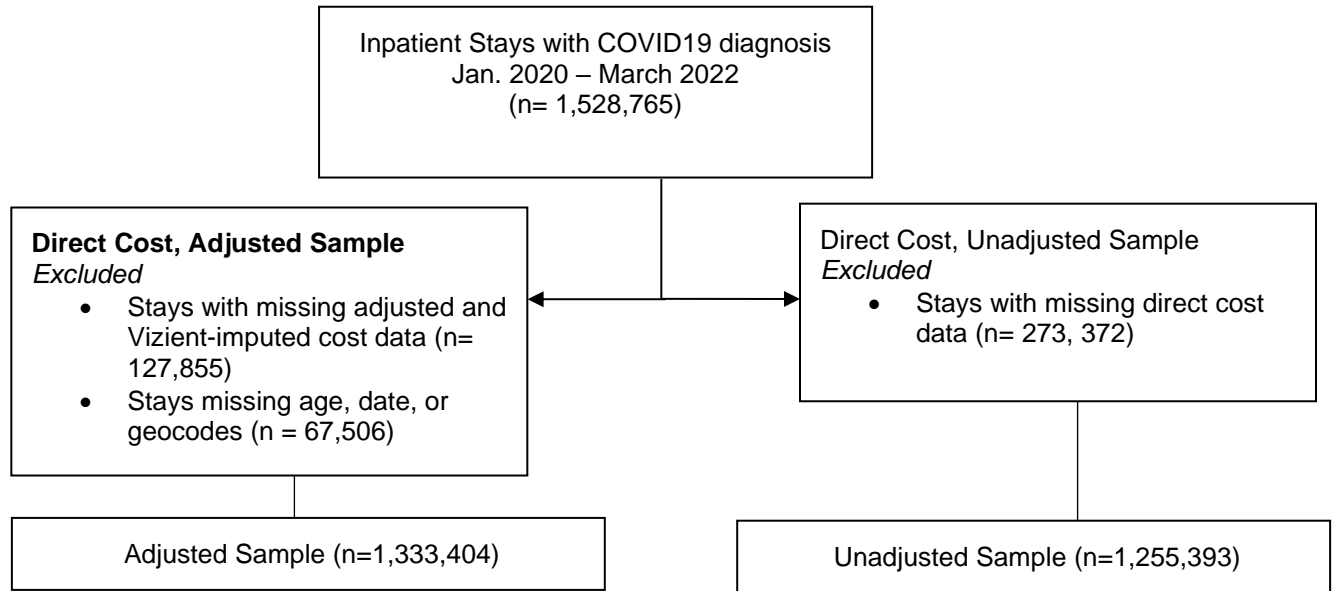

**eTable 1. GLM Regression Coefficients**

|                                             | Coefficient | 95% CI          |
|---------------------------------------------|-------------|-----------------|
| Patient Started in ED                       | 0.036       | (0.018,0.053)   |
| ICU Stay                                    | 0.152       | [0.19,0.22]     |
| Length of Stay (Days)                       | 0.010       | (0.009,0.01)    |
| Age                                         | 0.003       | (0.003,0.003)   |
| Hour of admission (24 <sup>th</sup> is ref) |             |                 |
| <b>1</b>                                    | -0.003      | (-0.016,0.009)  |
| <b>2</b>                                    | -0.010      | (-0.023,0.004)  |
| <b>3</b>                                    | -0.011      | (-0.023,0.002)  |
| <b>4</b>                                    | -0.023      | (-0.036,-0.01)  |
| <b>5</b>                                    | 0.000       | (-0.015,0.014)  |
| <b>6</b>                                    | -0.023      | (-0.037,-0.009) |
| <b>7</b>                                    | -0.035      | (-0.048,-0.021) |
| <b>8</b>                                    | -0.026      | (-0.04,-0.013)  |
| <b>9</b>                                    | -0.026      | (-0.039,-0.013) |
| <b>10</b>                                   | -0.026      | (-0.038,-0.013) |
| <b>11</b>                                   | -0.022      | (-0.035,-0.01)  |
| <b>12</b>                                   | -0.021      | (-0.033,-0.008) |
| <b>13</b>                                   | -0.021      | (-0.032,-0.009) |
| <b>14</b>                                   | -0.025      | (-0.036,-0.013) |
| <b>15</b>                                   | -0.026      | (-0.037,-0.014) |
| <b>16</b>                                   | -0.022      | (-0.034,-0.01)  |
| <b>17</b>                                   | -0.020      | (-0.032,-0.008) |
| <b>18</b>                                   | -0.020      | (-0.032,-0.009) |
| <b>19</b>                                   | -0.018      | (-0.029,-0.007) |
| <b>20</b>                                   | -0.023      | (-0.035,-0.011) |
| <b>21</b>                                   | -0.020      | (-0.031,-0.008) |
| <b>22</b>                                   | -0.020      | (-0.032,-0.008) |
| <b>23</b>                                   | -0.016      | (-0.028,-0.004) |
| <b>99</b>                                   | -0.044      | (-0.082,-0.007) |
| Sex (unknown is ref)                        |             |                 |
| <b>Male</b>                                 | -0.053      | (-0.187,0.08)   |
| <b>Female</b>                               | -0.180      | (-0.314,-0.046) |
| Race/Ethnicity (Missing is ref)             |             |                 |
| <b>White</b>                                | -0.039      | (-0.063,-0.014) |
| <b>Black</b>                                | -0.043      | (-0.068,-0.018) |
| <b>Asian</b>                                | -0.012      | (-0.038,0.014)  |
| <b>Hispanic</b>                             | -0.033      | (-0.057,-0.009) |
| <b>Other</b>                                | -0.014      | (-0.043,0.015)  |
| <b>Unknown</b>                              | -0.014      | (-0.044,0.016)  |

|                                                          |        |                 |
|----------------------------------------------------------|--------|-----------------|
| Admission Day of Week<br>(Sunday is ref)                 |        |                 |
| <b>Monday</b>                                            | 0.000  | (-0.004,0.004)  |
| <b>Tuesday</b>                                           | -0.004 | (-0.008,0)      |
| <b>Wednesday</b>                                         | -0.005 | (-0.009,-0.001) |
| <b>Thursday</b>                                          | -0.004 | (-0.008,0)      |
| <b>Friday</b>                                            | -0.003 | (-0.006,0.001)  |
| <b>Saturday</b>                                          | 0.000  | (-0.004,0.003)  |
| Number of Days in ICU                                    |        |                 |
|                                                          | -0.002 | (-0.003,-0.001) |
| Health Insurance<br>(Private/Commercial is ref)          |        |                 |
| <b>Medicaid</b>                                          | 0.037  | (0.03,0.043)    |
| <b>Medicare</b>                                          | 0.047  | (0.031,0.062)   |
| <b>Military</b>                                          | 0.050  | (0.037,0.064)   |
| <b>Self-pay</b>                                          | 0.220  | (0.191,0.249)   |
| <b>Workers Compensation/Auto</b>                         | 0.056  | (0.049,0.064)   |
| <b>Unknown</b>                                           | 0.000  | 0               |
| Extracorporeal membrane oxygenation                      |        |                 |
|                                                          | 1.175  | (1.125,1.225)   |
| Invasive Mechanical Ventilation                          |        |                 |
|                                                          | 0.779  | (0.764,0.793)   |
| Non-Invasive Mechanical Ventilation                      |        |                 |
|                                                          | 0.107  | (0.099,0.116)   |
| Number of COVID-19 stays at hospital on day of admission |        |                 |
|                                                          | 0.000  | (0,0)           |
| Census Division (East North Central is ref)              |        |                 |
| <b>Middle Atlantic</b>                                   | -0.013 | (-0.034,0.008)  |
| <b>New England</b>                                       | -0.050 | (-0.067,-0.034) |
| <b>West North Central</b>                                | 0.004  | (-0.024,0.032)  |
| <b>South Atlantic</b>                                    | 0.002  | (-0.016,0.02)   |
| <b>East South Central</b>                                | 0.040  | (0.012,0.068)   |
| <b>West South Central</b>                                | 0.051  | (0.026,0.077)   |
| <b>Mountain</b>                                          | 0.034  | (0.011,0.057)   |
| <b>Pacific</b>                                           | 0.062  | (0.033,0.091)   |
| Teaching hospital                                        |        |                 |
|                                                          | 0.037  | (0.023,0.051)   |
| COVID-19 Principal Diagnosis                             |        |                 |
|                                                          | 0.071  | (0.062,0.079)   |
| Patient Transferred in from Another Hospital             |        |                 |
|                                                          | 0.112  | (0.1,0.125)     |
| Number of weeks since Jan 1, 2020                        |        |                 |
| <b>6</b>                                                 | 0.251  | (-0.456,0.958)  |
| <b>7</b>                                                 | 1.766  | (0.796,2.735)   |
| <b>9</b>                                                 | 0.944  | (0.211,1.677)   |

|    |       |               |
|----|-------|---------------|
| 10 | 1.679 | (1.41,1.947)  |
| 11 | 1.889 | (1.692,2.086) |
| 12 | 1.837 | (1.69,1.984)  |
| 13 | 1.920 | (1.779,2.06)  |
| 14 | 1.948 | (1.808,2.088) |
| 15 | 1.947 | (1.807,2.087) |
| 16 | 1.935 | (1.794,2.076) |
| 17 | 1.931 | (1.791,2.072) |
| 18 | 1.913 | (1.772,2.054) |
| 19 | 1.906 | (1.766,2.046) |
| 20 | 1.901 | (1.76,2.042)  |
| 21 | 1.889 | (1.748,2.031) |
| 22 | 1.902 | (1.761,2.043) |
| 23 | 1.890 | (1.744,2.035) |
| 24 | 1.893 | (1.752,2.033) |
| 25 | 1.900 | (1.76,2.041)  |
| 26 | 1.898 | (1.758,2.038) |
| 27 | 1.921 | (1.78,2.062)  |
| 28 | 1.917 | (1.778,2.056) |
| 29 | 1.911 | (1.771,2.051) |
| 30 | 1.915 | (1.775,2.056) |
| 31 | 1.902 | (1.763,2.042) |
| 32 | 1.908 | (1.769,2.047) |
| 33 | 1.901 | (1.762,2.04)  |
| 34 | 1.899 | (1.759,2.04)  |
| 35 | 1.909 | (1.77,2.049)  |
| 36 | 1.916 | (1.774,2.057) |
| 37 | 1.919 | (1.779,2.058) |
| 38 | 1.894 | (1.755,2.033) |
| 39 | 1.919 | (1.779,2.06)  |
| 40 | 1.902 | (1.76,2.044)  |
| 41 | 1.902 | (1.762,2.042) |
| 42 | 1.909 | (1.768,2.05)  |
| 43 | 1.916 | (1.775,2.057) |
| 44 | 1.921 | (1.78,2.061)  |
| 45 | 1.918 | (1.778,2.057) |
| 46 | 1.921 | (1.782,2.06)  |
| 47 | 1.934 | (1.794,2.073) |
| 48 | 1.933 | (1.793,2.072) |
| 49 | 1.941 | (1.8,2.081)   |
| 50 | 1.939 | (1.8,2.079)   |
| 51 | 1.932 | (1.792,2.072) |
| 52 | 1.947 | (1.807,2.087) |

|    |       |               |
|----|-------|---------------|
| 53 | 1.939 | (1.8,2.079)   |
| 54 | 1.991 | (1.851,2.13)  |
| 55 | 1.998 | (1.858,2.138) |
| 56 | 1.994 | (1.854,2.133) |
| 57 | 1.992 | (1.852,2.132) |
| 58 | 2.006 | (1.865,2.147) |
| 59 | 1.995 | (1.855,2.135) |
| 60 | 2.002 | (1.862,2.142) |
| 61 | 1.997 | (1.857,2.137) |
| 62 | 2.016 | (1.875,2.157) |
| 63 | 2.006 | (1.865,2.147) |
| 64 | 2.017 | (1.877,2.156) |
| 65 | 2.016 | (1.876,2.157) |
| 66 | 2.014 | (1.874,2.155) |
| 67 | 2.034 | (1.895,2.172) |
| 68 | 2.027 | (1.887,2.168) |
| 69 | 2.034 | (1.894,2.174) |
| 70 | 2.031 | (1.891,2.171) |
| 71 | 2.046 | (1.907,2.186) |
| 72 | 2.052 | (1.91,2.194)  |
| 73 | 2.048 | (1.907,2.189) |
| 74 | 2.067 | (1.926,2.207) |
| 75 | 2.068 | (1.929,2.207) |
| 76 | 2.097 | (1.955,2.238) |
| 77 | 2.108 | (1.965,2.251) |
| 78 | 2.098 | (1.957,2.24)  |
| 79 | 2.109 | (1.967,2.252) |
| 80 | 2.109 | (1.97,2.247)  |
| 81 | 2.100 | (1.962,2.238) |
| 82 | 2.112 | (1.974,2.251) |
| 83 | 2.123 | (1.984,2.261) |
| 84 | 2.137 | (1.999,2.274) |
| 85 | 2.138 | (1.999,2.277) |
| 86 | 2.156 | (2.016,2.295) |
| 87 | 2.140 | (2.001,2.28)  |
| 88 | 2.155 | (2.016,2.294) |
| 89 | 2.153 | (2.014,2.292) |
| 90 | 2.158 | (2.018,2.298) |
| 91 | 2.156 | (2.015,2.296) |
| 92 | 2.150 | (2.01,2.29)   |
| 93 | 2.156 | (2.016,2.296) |
| 94 | 2.165 | (2.024,2.306) |
| 95 | 2.153 | (2.012,2.293) |

|     |       |               |
|-----|-------|---------------|
| 96  | 2.154 | (2.013,2.295) |
| 97  | 2.149 | (2.007,2.291) |
| 98  | 2.150 | (2.01,2.29)   |
| 99  | 2.158 | (2.017,2.299) |
| 100 | 2.161 | (2.021,2.301) |
| 101 | 2.161 | (2.021,2.302) |
| 102 | 2.169 | (2.029,2.309) |
| 103 | 2.159 | (2.019,2.299) |
| 104 | 2.136 | (1.996,2.276) |
| 105 | 2.116 | (1.976,2.256) |
| 106 | 2.183 | (2.043,2.322) |
| 107 | 2.187 | (2.047,2.327) |
| 108 | 2.201 | (2.06,2.342)  |
| 109 | 2.200 | (2.059,2.341) |
| 110 | 2.207 | (2.065,2.348) |
| 111 | 2.208 | (2.066,2.35)  |
| 112 | 2.222 | (2.079,2.364) |
| 113 | 2.223 | (2.079,2.367) |
| 114 | 2.237 | (2.091,2.383) |
| 115 | 2.223 | (2.078,2.368) |
| 116 | 2.201 | (2.058,2.344) |
| 117 | 2.201 | (2.055,2.346) |

Elixhauser comorbidity indicators:

|                                              |        |                 |
|----------------------------------------------|--------|-----------------|
| <b><i>Alcohol Use Disorder</i></b>           | -0.018 | (-0.027,-0.009) |
| <b><i>Blood Loss/ Anemia</i></b>             | -0.159 | (-0.177,-0.14)  |
| <b><i>Chronic Peptic Ulcer Disease</i></b>   | 0.030  | (0.009,0.051)   |
| <b><i>Chronic Pulmonary Disease</i></b>      | 0.042  | (0.039,0.045)   |
| <b><i>Coagulation Deficiency</i></b>         | 0.253  | (0.244,0.262)   |
| <b><i>Congestive Heart Failure</i></b>       | 0.074  | (0.07,0.079)    |
| <b><i>Deficiency Anemia</i></b>              | 0.077  | (0.072,0.081)   |
| <b><i>Depression</i></b>                     | -0.007 | (-0.011,-0.004) |
| <b><i>Diabetes with complications</i></b>    | 0.022  | (0.018,0.026)   |
| <b><i>Diabetes without complications</i></b> | -0.019 | (-0.022,-0.015) |
| <b><i>Substance Use Disorder</i></b>         | -0.032 | (-0.041,-0.024) |
| <b><i>Fluid Electro Disorders</i></b>        | 0.157  | (0.152,0.162)   |
| <b><i>HIV/AIDS</i></b>                       | -0.057 | (-0.111,-0.003) |
| <b><i>Hypertension</i></b>                   | 0.042  | (0.036,0.048)   |
| <b><i>Hypothyroidism</i></b>                 | 0.010  | (0.006,0.013)   |
| <b><i>Liver Disease</i></b>                  | 0.014  | (0.007,0.02)    |
| <b><i>Lymphoma</i></b>                       | 0.037  | (0.024,0.05)    |
| <b><i>Metastatic Cancer</i></b>              | 0.060  | (0.049,0.07)    |

|                                                       |         |                 |
|-------------------------------------------------------|---------|-----------------|
| <b>Obesity</b>                                        | 0.266   | (0.262,0.27)    |
| <b>Other Neurological Disorders</b>                   | -0.065  | (-0.07,-0.06)   |
| <b>Paralysis</b>                                      | 0.039   | (0.031,0.046)   |
| <b>Peripheral Vascular Disorders</b>                  | 0.124   | (0.113,0.134)   |
| <b>Psychoses</b>                                      | -0.041  | (-0.048,-0.035) |
| <b>Pulmonary Circulation Disorders</b>                | 0.139   | (0.13,0.149)    |
| <b>Renal Failure</b>                                  | 0.067   | (0.062,0.072)   |
| <b>Rheumatoid Arthritis/Collagen Vascular Disease</b> | 0.011   | (0.003,0.019)   |
| <b>Solid Tumor without Metastasis</b>                 | -0.035  | (-0.045,-0.025) |
| <b>Valvular Disease</b>                               | 0.072   | (0.064,0.079)   |
| <b>Weight Loss</b>                                    | 0.098   | (0.089,0.106)   |
| Died                                                  | -0.520  | (-0.532,-0.509) |
| Discharge Status (unknown is ref)                     |         |                 |
| <b>Home</b>                                           | -0.399  | (-0.409,-0.389) |
| <b>Hospital</b>                                       | -0.429  | (-0.443,-0.414) |
| <b>SNF/Rehab</b>                                      | -0.140  | (-0.162,-0.118) |
| <b>Home Health</b>                                    | -0.327  | (-0.337,-0.317) |
| <b>Hospice</b>                                        | -0.469  | (-0.482,-0.456) |
| Average Cases per 100k in zip code                    | 0.000   | (0,0)           |
| Constant                                              | 6.893   | (6.701,7.085)   |
| <i>N</i>                                              | 1333404 |                 |

Notes: Data from the Vizient Clinical Data Base used by permission of Vizient, Inc. All rights reserved. Standard errors clustered at the hospital level.

95% confidence intervals in parenthesis



**eTable 2. Average Adjusted Costs, Length of Stay (LOS) by Presence of Elixhauser Comorbidity**

|                                                       | Mean Additional Cost | # of Stays | % of Sample | Length of Stay (Days) |               | Included ICU Stay |             |
|-------------------------------------------------------|----------------------|------------|-------------|-----------------------|---------------|-------------------|-------------|
|                                                       |                      |            |             | Mean                  | 95% CI        | Mean              | 95% CI      |
| <b>Coagulation Deficiency</b>                         | \$3,017              | 71316      | 5%          | 11.83                 | (11.73,11.93) | 40%               | (39.5,40.2) |
| <b>Obesity</b>                                        | \$2,924              | 420057     | 32%         | 10.35                 | (10.31,10.4)  | 32%               | (32,32.3)   |
| <b>Fluid Electro Disorders</b>                        | \$1,800              | 307509     | 23%         | 10.21                 | (10.17,10.25) | 34%               | (33.6,34)   |
| <b>Pulmonary Circulation Disorders</b>                | \$1,667              | 20177      | 2%          | 10.50                 | (10.32,10.67) | 37%               | (36.4,37.7) |
| <b>Peripheral Vascular Disorders</b>                  | \$1,431              | 28500      | 2%          | 11.35                 | (11.2,11.51)  | 35%               | (34,35.1)   |
| <b>Weight Loss</b>                                    | \$966                | 116364     | 9%          | 15.20                 | (15.1,15.31)  | 39%               | (38.5,39)   |
| <b>Congestive Heart Failure</b>                       | \$918                | 218789     | 16%         | 10.92                 | (10.86,10.98) | 35%               | (35.1,35.5) |
| <b>Valvular Disease</b>                               | \$848                | 67711      | 5%          | 11.68                 | (11.57,11.79) | 35%               | (34.3,35)   |
| <b>Renal Failure</b>                                  | \$822                | 141012     | 11%         | 10.80                 | (10.73,10.86) | 34%               | (33.3,33.7) |
| <b>Deficiency Anemia</b>                              | \$805                | 274142     | 21%         | 11.91                 | (11.85,11.97) | 34%               | (33.7,34)   |
| <b>Hypertension</b>                                   | \$735                | 427519     | 32%         | 9.584                 | (9.55,9.618)  | 29%               | (29.2,29.5) |
| <b>Metastatic Cancer</b>                              | \$585                | 23469      | 2%          | 10.17                 | (10.01,10.33) | 26%               | (25.2,26.3) |
| <b>Chronic Pulmonary Disease</b>                      | \$503                | 297397     | 22%         | 9.620                 | (9.574,9.666) | 29%               | (28.6,29)   |
| <b>Chronic Peptic Ulcer Disease</b>                   | \$378                | 3921       | 0%          | 15.54                 | (15.01,16.07) | 43%               | (41.7,44.8) |
| <b>Lymphoma</b>                                       | \$341                | 16010      | 1%          | 10.86                 | (10.66,11.07) | 28%               | (27.7,29.1) |
| <b>Paralysis</b>                                      | \$312                | 51598      | 4%          | 12.57                 | (12.43,12.71) | 36%               | (35.8,36.6) |
| <b>Diabetes with complications</b>                    | \$306                | 183224     | 14%         | 10.95                 | (10.89,11.01) | 34%               | (33.9,34.3) |
| <b>Hypothyroidism</b>                                 | \$157                | 166092     | 12%         | 9.726                 | (9.665,9.788) | 28%               | (28.1,28.5) |
| <b>Rheumatoid Arthritis/Collagen Vascular Disease</b> | \$116                | 22707      | 2%          | 9.446                 | (9.302,9.591) | 29%               | (28.2,29.4) |
| <b>Liver Disease</b>                                  | \$112                | 39868      | 3%          | 11.15                 | (11.01,11.29) | 34%               | (34,34.9)   |
| <b>Diabetes without complications</b>                 | -\$114               | 147560     | 11%         | 7.557                 | (7.509,7.606) | 25%               | (25.2,25.6) |
| <b>Depression</b>                                     | -\$137               | 170541     | 13%         | 10.63                 | (10.56,10.71) | 28%               | (27.6,28)   |
| <b>Alcohol Use Disorder</b>                           | -\$223               | 46292      | 3%          | 11.05                 | (10.9,11.21)  | 34%               | (33.1,33.9) |
| <b>Solid Tumor without Metastasis</b>                 | -\$279               | 12424      | 1%          | 9.898                 | (9.704,10.09) | 28%               | (27.3,28.8) |
| <b>Substance Use Disorder</b>                         | -\$472               | 44845      | 3%          | 10.97                 | (10.81,11.14) | 30%               | (29.2,30)   |
| <b>HIV/AIDS</b>                                       | -\$488               | 646        | 0%          | 13.53                 | (12,15.07)    | 31%               | (26.9,34.1) |
| <b>Psychoses</b>                                      | -\$593               | 64876      | 5%          | 10.75                 | (10.62,10.87) | 27%               | (26.3,27)   |
| <b>Other Neurological Disorders</b>                   | -\$679               | 68266      | 5%          | 10.30                 | (10.21,10.39) | 29%               | (28.5,29.2) |
| <b>Blood Loss/ Anemia</b>                             | -\$1,669             | 9081       | 1%          | 7.586                 | (7.345,7.828) | 24%               | (22.9,24.7) |

Notes: Data from the Vizient Clinical Data Base used by permission of Vizient, Inc. All rights reserved. Derived using margins command post-estimation of GLM (see Supplemental Table 1 for full set of coefficients). 95% CI in parentheses.

**eTable 3. Average Adjusted Mortality Rate, Age, and ECMO/Mechanical Ventilation Use, by Presence of Elixhauser Comorbidity**

|                                                       | Death    |             | Age   |               | ECMO or Mechanical Ventilation Use |             |
|-------------------------------------------------------|----------|-------------|-------|---------------|------------------------------------|-------------|
|                                                       | Mean (%) | 95% CI      | Mean  | 95% CI        | Mean (%)                           | 95% CI      |
| <b>Coagulation Deficiency</b>                         | 22%      | (21.5,22.1) | 63.14 | (63.02,63.26) | 33%                                | (32.4,33.1) |
| <b>Obesity</b>                                        | 13%      | (12.6,12.8) | 56.10 | (56.05,56.15) | 30%                                | (29.6,29.8) |
| <b>Fluid Electro Disorders</b>                        | 16%      | (16.2,16.4) | 63.26 | (63.2,63.31)  | 27%                                | (26.3,26.6) |
| <b>Pulmonary Circulation Disorders</b>                | 16%      | (15.8,16.8) | 62.36 | (62.15,62.57) | 29%                                | (28.1,29.4) |
| <b>Peripheral Vascular Disorders</b>                  | 19%      | (18.1,19)   | 70.80 | (70.65,70.95) | 26%                                | (25.4,26.4) |
| <b>Weight Loss</b>                                    | 20%      | (19.5,19.9) | 66.29 | (66.2,66.37)  | 32%                                | (31.5,32)   |
| <b>Congestive Heart Failure</b>                       | 19%      | (18.5,18.8) | 68.89 | (68.84,68.95) | 31%                                | (30.5,30.9) |
| <b>Valvular Disease</b>                               | 18%      | (17.7,18.2) | 70.33 | (70.22,70.43) | 28%                                | (28.1,28.8) |
| <b>Renal Failure</b>                                  | 20%      | (19.4,19.8) | 68.81 | (68.74,68.88) | 27%                                | (26.7,27.2) |
| <b>Deficiency Anemia</b>                              | 16%      | (15.6,15.8) | 62.49 | (62.42,62.55) | 28%                                | (27.3,27.6) |
| <b>Hypertension</b>                                   | 14%      | (13.9,14.1) | 66.11 | (66.06,66.15) | 23%                                | (23,23.2)   |
| <b>Metastatic Cancer</b>                              | 18%      | (17.3,18.3) | 65.39 | (65.22,65.56) | 18%                                | (17.9,18.9) |
| <b>Chronic Pulmonary Disease</b>                      | 13%      | (13,13.3)   | 63.37 | (63.31,63.43) | 26%                                | (25.5,25.8) |
| <b>Chronic Peptic Ulcer Disease</b>                   | 17%      | (15.7,18.1) | 65.34 | (64.89,65.8)  | 33%                                | (31.4,34.4) |
| <b>Lymphoma</b>                                       | 18%      | (17.1,18.3) | 66.80 | (66.59,67.01) | 25%                                | (23.9,25.2) |
| <b>Paralysis</b>                                      | 15%      | (14.7,15.4) | 64.07 | (63.94,64.2)  | 26%                                | (25.1,25.8) |
| <b>Diabetes with complications</b>                    | 17%      | (16.5,16.8) | 65.11 | (65.05,65.17) | 28%                                | (27.7,28.1) |
| <b>Hypothyroidism</b>                                 | 14%      | (13.3,13.6) | 67.10 | (67.03,67.17) | 23%                                | (23,23.4)   |
| <b>Rheumatoid Arthritis/Collagen Vascular Disease</b> | 14%      | (13.2,14.1) | 64.82 | (64.62,65.01) | 22%                                | (21.6,22.6) |
| <b>Liver Disease</b>                                  | 15%      | (14.3,15)   | 58.23 | (58.08,58.37) | 26%                                | (25.7,26.5) |
| <b>Diabetes without complications</b>                 | 10%      | (9.8,10.1)  | 61.89 | (61.82,61.97) | 19%                                | (18.7,19.1) |
| <b>Depression</b>                                     | 11%      | (10.8,11.1) | 61.35 | (61.27,61.43) | 23%                                | (22.6,23)   |
| <b>Alcohol Use Disorder</b>                           | 10%      | (10.1,10.6) | 54.15 | (54.01,54.28) | 23%                                | (22.3,23)   |
| <b>Solid Tumor without Metastasis</b>                 | 16%      | (14.9,16.2) | 69.54 | (69.33,69.75) | 20%                                | (19.4,20.8) |
| <b>Substance Use Disorder</b>                         | 7%       | (6.2,6.7)   | 47.21 | (47.07,47.35) | 20%                                | (19.5,20.2) |
| <b>HIV/AIDS</b>                                       | 7%       | (5.1,9.1)   | 50.44 | (49.36,51.52) | 18%                                | (15.1,21.1) |
| <b>Psychoses</b>                                      | 9%       | (8.8,9.3)   | 56.26 | (56.14,56.39) | 20%                                | (19.6,20.2) |
| <b>Other Neurological Disorders</b>                   | 15%      | (15.1,15.6) | 67.53 | (67.41,67.65) | 22%                                | (21.3,21.9) |
| <b>Blood Loss/ Anemia</b>                             | 7%       | (6.2,7.3)   | 41.46 | (41.05,41.88) | 14%                                | (12.8,14.2) |

Notes: Data from the Vizient Clinical Data Base used by permission of Vizient, Inc. All rights reserved. Derived using margins command post-estimation of GLM (see Supplemental Table 3 for full set of coefficients). 95% CI in parentheses.

**eFigure 2. Adjusted Costs of Inpatient by ECMO/Mechanical Ventilation and Week**

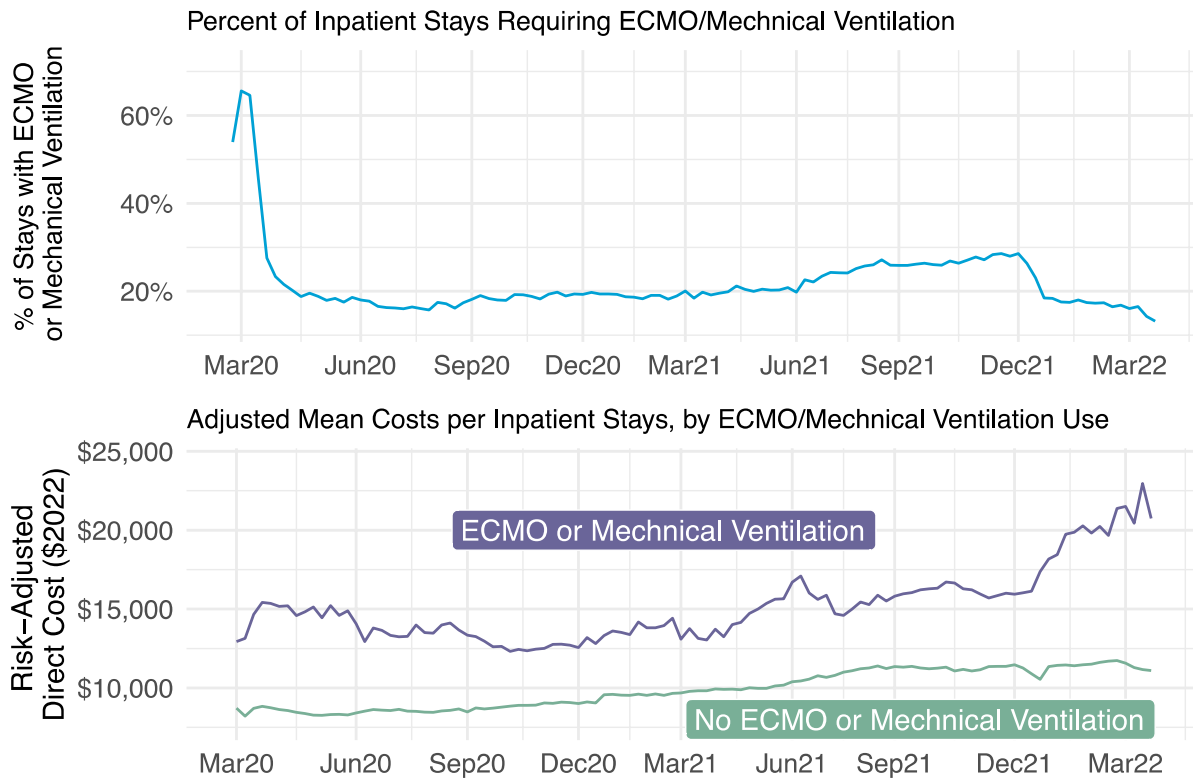

Supplement: jamanetwopen-e2350145-s001.pdf [file jamanetwopen-e2350145-s001.pdf]
