# Supplementary material for: Inpatient Costs of Treating Patients With COVID-19
Source: PubMed Central journal article supplement (PMC10765267; doi:10.1001/jamanetworkopen.2023.50145), 2024-01-03
Supplement: jamanetwopen-e2350145-s002.pdf [file jamanetwopen-e2350145-s002.pdf]

## Data Sharing Statement

Kapinos. Inpatient Costs of Treating Patients With COVID-19. *JAMA Netw Open*. Published January 03, 2024. doi:10.1001/jamanetworkopen.2023.50145

### Data

**Data available:** No

### Additional Information

**Explanation for why data not available:** Proprietary data; those interested can apply to Vizient for access.
